# Supplementary material
Source: PubMed Central journal article supplement (PMC8182774)
Supplement: NIHMS1699871-supplement-Supplementary_Information.pdf [file NIHMS1699871-supplement-Supplementary_Information.pdf]

## Supplementary Information

### Targeted Single Cell RNA and DNA Sequencing with Fluorescent Activated Droplet Merger

Iain C. Clark<sup>1,3</sup>, Cyrille L. Delley<sup>1</sup>, Chen Sun<sup>1</sup>, Rohan Thakur<sup>2</sup>, Shannon L. Stott<sup>2</sup>, Shravan Thaploo<sup>3</sup>, Zhaorong Li<sup>3</sup>, Francisco J. Quintana<sup>3,4</sup>, Adam R. Abate<sup>1,5,\*</sup>

1. Department of Bioengineering and Therapeutic Sciences, University of California, San Francisco, San Francisco, California 94158, USA
2. Center for Engineering in Medicine, Massachusetts General Hospital, Harvard Medical School, Boston, MA 02114, USA
3. Ann Romney Center for Neurologic Diseases, Brigham and Women's Hospital, Harvard Medical School, Boston, MA 02115, USA
4. Broad Institute of MIT and Harvard, Cambridge, MA 02142, USA.
5. Chan Zuckerberg Biohub, San Francisco, CA 94158,, USA

\* Corresponding author: [adam@abatelab.org](mailto:adam@abatelab.org)

### Table of Contents

Provided in this document:

Figure S1

Table S1

Table S2

Provided elsewhere:

Movie S1. Operation of the microfluidic device used in Figure 2.

Movie S2. Operation of the microfluidic device used in Figure 3.

Movie S3. Operation of the microfluidic device used in Figure 4.

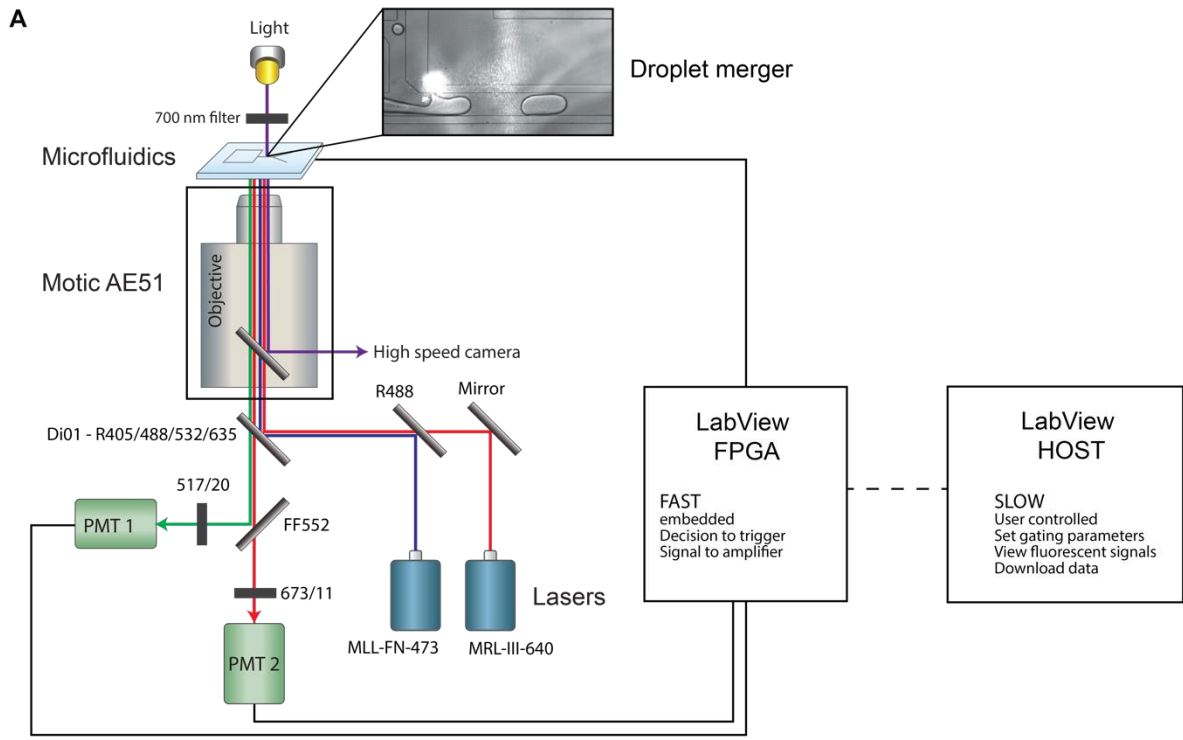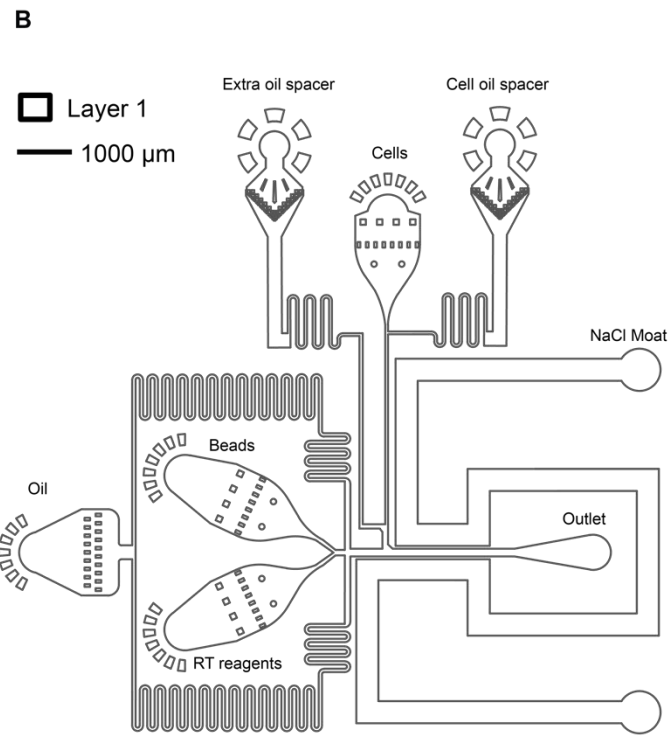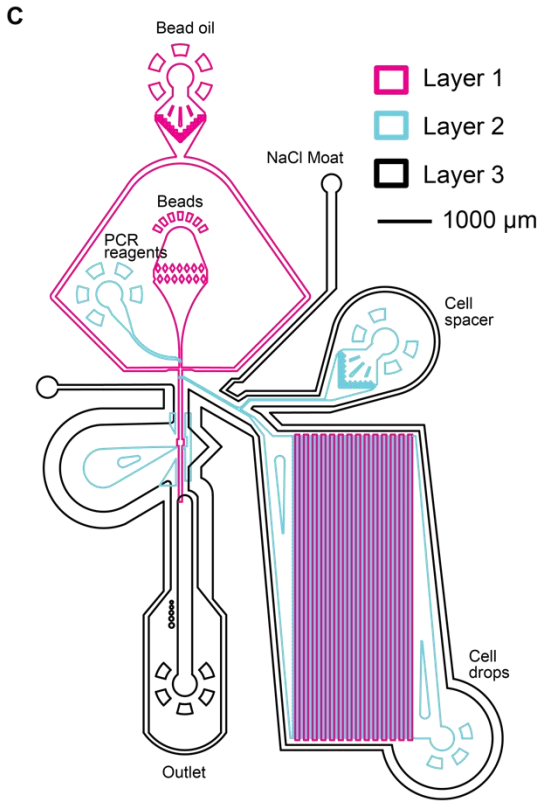

**Figure S1. A)** Overview of the optical setup used for selective merger. **B)** Design of the microfluidic device used for single cell RNA-seq. **C)** Design of the microfluidic device used for single cell DNA-seq.

| <b>Table S1: DNA-seq primers</b> |                    |                                                  |
|----------------------------------|--------------------|--------------------------------------------------|
| <b>Bead primers</b>              | <b>Location</b>    | <b>Sequence</b>                                  |
| <b>fw p1</b>                     | p17 EZH2_1         | /5Phos/ TTCGAG TGCAAATTCAGAATTTCAAACCTGCA*T*G*T  |
| <b>fw p2</b>                     | p17 FLT3_1         | /5Phos/ TTCGAG GCAGACTGCTGTGAGGGTT*T*T*T         |
| <b>fw p3</b>                     | p17 FLT3_3         | /5Phos/ TTCGAG GAGTGCTCAGTGTCTAATTC*A*C*T*T      |
| <b>fw p4</b>                     | p17 KIT_1_s        | /5Phos/ TTCGAG CTAAAATGTGTGATATCCCTAGACAGG*A*T*T |
| <b>fw p5</b>                     | p17 KRAS_1_s       | /5Phos/ TTCGAG AAAGGTGAGTTTGTATTTAAAAGGTA*G*G*T  |
| <b>fw p6</b>                     | p17 NPM1_1_2       | /5Phos/ TTCGAG TTCTTGGAGTCATATCTTTATCTAG*A*G*T   |
| <b>fw p7</b>                     | p17 TP53_1         | /5Phos/ TTCGAG GGGTTATAGGGAGGTCAAATAA*G*C*A      |
| <b>fw p8</b>                     | p17 TP53_2         | /5Phos/ TTCGAG TGTGATGAGAGGTGGATGG*G*T*A         |
| <b>fw p9</b>                     | p17 TP53_3_s       | /5Phos/ TTCGAG TGCCGTCTTCCAGTTGCTT*T*A*T         |
| <b>fw p10</b>                    | p17 WT1_3          | /5Phos/ TTCGAG GCCTGGAAAAGGAGCTCTT*G*A*A         |
| <b>fw p11</b>                    | p17 chr10_5554293  | /5Phos/ TTCGAG CCCTAACCATCGTTCCTTC*A*G*G         |
| <b>fw p12</b>                    | p17 chr16_55770629 | /5Phos/ TTCGAG TCCAGTGCTCCCAGG*C*A*T             |
| <b>fw p13</b>                    | p17 chr16_8569820  | /5Phos/ TTCGAG ATTCATGACCACTCTATTTCTT*T*C*T      |
| <b>fw p14</b>                    | p17 chr18_9750662  | /5Phos/ TTCGAG CGGATTGGCCAGTGCA*T*T*C            |
| <b>fw p15</b>                    | p17 chr6_17076840  | /5Phos/ TTCGAG TGAACCTAGGAGGCTGA*G*G*T           |
| <b>fw p16</b>                    | p17 chr6_62094287  | /5Phos/ TTCGAG GTTAGCCATTCTCTCTAGT*G*C*C         |
| <b>splint p17</b>                |                    | CTCGAA TAGG                                      |
|                                  |                    |                                                  |
| <b>Solution primers</b>          | <b>Location</b>    | <b>Sequence</b>                                  |
| <b>rev p18</b>                   | EZH2_1             | CATTTTAATGCACCCACTATCTTCAGC                      |
| <b>rev p19</b>                   | FLT3_1             | CTCTGGTGTGTCATTCTTGACAGTGT                       |
| <b>rev p20</b>                   | FLT3_3             | ACAGAAAAAGCAGACAGCTCTGAAA                        |
| <b>rev p21</b>                   | KIT_1_s            | AAATGGTTTTCTTTCTCCTCCAACCTA                      |
| <b>rev p22</b>                   | KRAS_1_s           | AAAGAATGGTCCTGCACCAAGTAA                         |
| <b>rev p23</b>                   | NPM1_1_2           | TCTGCATTATAAAAAGGACAGCC                          |
| <b>rev p24</b>                   | TP53_1             | GGCCTCTGATTCTCCTCACTGATTG                        |
| <b>rev p25</b>                   | TP53_2             | CCTCATCTTGGGCCTGTGTTAT                           |
| <b>rev p26</b>                   | TP53_3_s           | CTGCTCACCATCGCTATCTGAG                           |
| <b>rev p27</b>                   | WT1_3              | TCAAGACCTACGTGAATGTTACATG                        |
| <b>rev p28</b>                   | chr10_5554293      | GGAAACGGGGTGTGCGAA                               |
| <b>rev p29</b>                   | chr16_55770629     | GTGGTGAGGAGATCAGGAGGAT                           |
| <b>rev p30</b>                   | chr16_8569820      | CATGGACATGGCCTGCAC                               |
| <b>rev p31</b>                   | chr18_9750662      | TCAGATGAACCAAAGGAAGTATGT                         |
| <b>rev p32</b>                   | chr6_17076840      | AGATTCTGGTACATTGTGTCTTTATTCT                     |
| <b>rev p33</b>                   | chr6_62094287      | TCTGCAACTCTACTGATAGTGAT                          |
| <b>5' handle</b>                 |                    | GTCTCGTGGGCTCGGAGATGTGTATAAGAGACAG               |

| <b>Table S2: Polymorphisms used for cell identification</b> |
|-------------------------------------------------------------|
| EZH2:chr7:148504716:AG/A                                    |
| NPM1:chr5:170837457:A/G                                     |
| TP53:chr17:7578115:T/C                                      |
| RBFOX1-TMEM114:chr16:8569722:T/C                            |
| LOC101928433-STMND1:chr6:17076799:TAA/T                     |
| LOC101928433-STMND1:chr6:17076799:TA/T                      |
| FLT3:chr13:28602226:AAGAG/A                                 |
| chr13:28602229:AGAGAGAG/*                                   |
| TP53:chr17:7577427:G/A                                      |
| TP53:chr17:7577407:A/C                                      |
| chr13:28602227:AGAG/*                                       |
| chr7:148504717:G/*                                          |
| chr6:17076801:A/*                                           |
| LOC101928433-STMND1:chr6:17076801:A/G                       |
| TP53:chr17:7578523:T/TG                                     |
| TP53:chr17:7578523:T/G                                      |
